# Supplementary material for: Multi-stage metabolomics and genetic analyses identified metabolite biomarkers of metabolic syndrome and their genetic determinants
Source: PubMed Central journal article supplement — eBioMedicine. 2021 Nov 18;74:103707. doi: 10.1016/j.ebiom.2021.103707 (PMC8605407; doi:10.1016/j.ebiom.2021.103707), 2021-11-18
Supplement: mmc1.pdf [file mmc1.pdf]

## Supplementary Materials

### Study population selection

In untargeted metabolomic analyses, to screen the MetS-associated metabolites, 120 MetS patients and 120 controls matched by age and sex were randomly selected from our previous cross-sectional survey on MetS in Hangzhou, Zhejiang, China, which was a questionnaire-based epidemiological interview started in 2010 and consisted of 862 MetS patients and 880 healthy controls. The detailed information of this population has been previously published<sup>1</sup>. To internally replicate the screened MetS-associated metabolites, 575 MetS patients and 582 healthy controls were randomly selected from the same cross-sectional survey other than subjects in the discovery dataset. External replication was performed using a targeted metabolomics approach in a sub-population of the Zhejiang Metabolic Syndrome Cohort, namely Xiazhi sub-cohort (N=1420), which was an ongoing community-based study started in 2009<sup>2</sup>. According to the same MetS criterion adopted in the untargeted metabolomics, 149 MetS patients and 253 controls were included in this sub-cohort and were selected as the external replication dataset.

### Targeted metabolomics analyses

**Sample pretreatment** 600  $\mu$ l dichloromethane was added to 150  $\mu$ l thawed plasma sample, followed by 1 ml methanol containing internal standards stock solution. After vortex for 30 seconds, the sample was centrifuged at 3000 rcf at 4°C for 5 minutes. The lower layer (400  $\mu$ l) was pipetted into a 2.0 mL tube and evaporated under nitrogen gas. The dried residuals then were re-dissolved using isopropanol solution and centrifuged at 3000 rcf at 4°C for 5 minutes to perform the MS analysis. The upper layer (800  $\mu$ l) was pipetted into a 96-well plate and dried under nitrogen gas. The dried residuals were then reconstituted in acetonitrile-water (1:1) and centrifuged at 3000 rcf at 4°C for 5 minutes to perform the MS analysis. To ensure data quality, the aliquots of quality control samples were obtained by pooling 20  $\mu$ l re-dissolved and centrifuged samples. The QCs samples were injected at the beginning and end of the analyses and every fifteen injections across the test.

**Chromatographic separation** Agilent 1290 infinity liquid chromatography system (Agilent Technologies) was used to perform the analysis. Two columns including Waters, BEH C18 column (1.7  $\mu$ m, 2.1 mm $\times$ 100 mm) and Waters, BEH Amide column (1.7  $\mu$ m, 2.1 mm $\times$ 100 mm) were used. The flow rate was maintained at 0.3 mL/min. The sampler and column temperature were maintained at 4°C and 35 °C, respectively. The injection volume was 4  $\mu$ l. For the C18 column, the mobile phase consists of (A) 10 mM NH<sub>4</sub>HCOO with 0.1% formic acid in methanol-water (3:2, v/v) and (B) 10 mM NH<sub>4</sub>HCOO with 0.1% formic acid in acetonitrile/isopropanol (1:9, v/v). The gradient duration program was as follows: 3 min hold at 20% B, a linear increase from 20% B to 40% B in 2 min, 40% B to 75% B in 4 min, 75% B to 99% B in 0.1 min, 3.9 min hold at 99% B, a linear decrease from 99% B to 20% B in 0.1 min and 2.9 min equilibration at 20% B. For the Amide column, the mobile phase was composed of (A) 25 mM NH<sub>4</sub>HCOO with 0.1% formic acid in water (3:2, v/v) and (B) 25 mM NH<sub>4</sub>HCOO with 0.1% formic acid in acetonitrile. The gradient duration program was as follows: 1 min hold at 85% B, a linear decrease from 85% B to 70% B in 10 min, 70% B to 40% B in 0.1 min, 0.9 min hold at 40% B, a linear increase from 40% B to 85% B in 0.1 min, 2.9 min equilibration at 85% B. UPLC system control and data analyses were performed by Xcalibur software (Version 3.2).

**Mass Spectrometer parameters** Thermo Scientific TSQ Altis Triple Quadrupole Mass Spectrometer equipped with an electrospray ionization (ESI) source was used to perform the analyses under positive and negative ion modes. The conditions were as follows: the spray voltages were 3800 V and 3500 V in positive ion mode and negative ion mode, respectively. The sheath gas flow was 30 arbitrary units (Arb).

The auxiliary gas flow was 10 Arb. The sweep gas was 8 Arb. The collision gas was 1.5 mTorr. The ion transfer tube temperature was 350 °C. The vaporizer temperature was 300 °C. The spray voltage was 3.0 kV. All targets were monitored by transition precursor and product in dynamic multiple reaction mode (MRM). The optimized MRM transition, ionization mode, collision energy and RF lens voltage are presented at Table S2. Thermo Scientific TraceFinder software (version 4.1) was applied to obtain the data.

**Method validation** For the calibration curve, 150 µl serial dilution of standards solutions were spiked with 1ml methanol containing internal standards (IS) stock. After vortex for 30 seconds, 600 µl dichloromethane was added. Subsequent sample preparation was the same as abovementioned protocol. The calibration curves were drawn according to the peak area ratios of the serial diluted standards to IS on respective column. As to those metabolites without IS, their calibration curves were obtained according to their chromatographically neighboring or structurally similar IS. The linearity, limit of quantification (LOQ) and stability of the method were assessed (Table S3), which showed a good linearity and a low limit of quantification. The concentrations were quantified in ng/ml. The peak with signal-to-noise ratio <3 was manually checked.

#### **Statistical analysis for the metabolomics data**

In untargeted metabolomics analyses, the Mann-Whitney U test was used to test the difference between the MetS and control groups. Multiple comparisons were corrected using the false discovery rate (FDR). A multivariate analysis was performed using an orthogonal partial least-squared discriminant analysis (OPLS-DA). The variable importance in the projection (VIP) was calculated by OPLS-DA, which revealed the contribution of each variable to the discrimination between the MetS patients and controls. Variables with adjusted FDR P-value <0.05 & VIP>1 were selected as the differential metabolites of MetS. The differential metabolites that had consistent effect directions in the discovery and internal validation datasets were included into the external validation. External validation was conducted on scaled data using logistic regression analysis after adjustment for age and sex. Metabolites with raw P-values <0.05, and consistent association effect directions were considered as successfully replicated. A subgroup analysis by sex was performed. Sensitivity analyses were carried out by excluding the subjects with CVD or with a history of drug use in the recent two weeks, including antihypertensive, anti-hyperglycaemic, anti-hyperlipidaemic, and anti-inflammatory drugs, or with smoking, drinking, and type 2 diabetes.

#### **Quality control procedure for the GWAS data**

The initial quality control was performed by removing sex discrepancies, ethnic outliers, probable relatives, and those with a call rate <0.95 and excessive genome-wide heterozygosity. SNPs with minor allele frequency <0.01, Hardy-Weinberg equilibrium  $P < 1 \times 10^{-4}$ , call-rate <0.95, and not in autosomal chromosomes were excluded. Imputation was performed using the University of Michigan imputation servers. Following imputation, SNPs with poor imputation quality ( $R^2 < 0.3$ ) were filtered. Consequently, 40,001,312 SNPs remained.

#### **Statistical analysis for the GWAS data**

GWAS analyses were performed with linear regression (for continuous variables) or logistic regression analysis (for dichotomous variables) under an additive genetic model in PLINK2. Prior to the analyses, inversed-normalized residuals adjusted for age, sex and the first two genetic principal components were calculated for each metabolite with the R package “GenABEL”. A significant GWAS threshold was set at  $P < 5 \times 10^{-8}$ . The suggested GWAS threshold was set at  $P < 5 \times 10^{-5}$ . A clump procedure in PLINK was run for the suggestive GWAS signals (1Mb,  $R^2 < 0.5$ ). Clumped SNPs were subsequently selected into the

replication stage. SNPs with  $P < 0.05$  and consistent effect directions were successfully replicated.

### **Mendelian randomization (MR) analyses**

One-sample MR analyses were used to evaluate the causal relationships between metabolites and MetS and its components. In this study, the SNPs that were independently and significantly associated with metabolites were used to construct an additive weighted genetic risk score (wGRS) as the instrumental variable (IV). The formula is as follows:

$$\text{wGRS} = \frac{\sum_1^i \beta \times N}{\sum_1^i \beta}$$

$\beta$ , the coefficient of the association between SNP and metabolites;  $N$ , number of risk alleles;  $i$ , number of instrumental SNPs

To verify the consumption of MR, F statistics were calculated to evaluate the strength of the IV. The study design of the MR analyses was shown in Figure S2. First, a linear regression was performed to assess the associations between wGRS and the metabolites ( $\beta ZX$ ). Second, the associations of the wGRS with metabolic syndrome and its components were examined ( $\beta ZY$ ). Third, observational estimates of the relationships between metabolites and metabolic syndrome and its components were calculated ( $\beta XY$ ). The causal estimates were assessed using the Wald-type estimator. All regression models were adjusted for age and sex. The statistical significance was set at  $P < 0.05$ .

A two-sample MR analysis was conducted using summary statistics from Japan Biobank to replicate the causal associations between metabolites and metabolic markers (body mass index, systolic blood pressure, diastolic blood pressure, total triglycerides, and high-density lipoprotein cholesterol, <https://gwas.mrcieu.ac.uk/>). The inverse variance weighted method (IVW) was used as the main analysis. By calculating the Wald estimates (ratio of SNP on outcome to SNP on exposure), IVW provides a combined estimate of the causal estimate for each SNP<sup>3</sup>. The weighted median and MR-Egger methods were supplemented as sensitivity analyses. Through calculating the median of an empirical distribution of MR association estimates weighted by their precisions, this method provides a reliable estimate when at least 50% of the variants are invalid instrumental variables. MR-Egger regression also used an inverse-variance weighted estimator. But unlike IVW, it allows the intercept of the regression to be non-zero and provides a pleiotropy-corrected causal estimate. If the intercept is non-zero, it suggests the presence of horizontal pleiotropy<sup>3</sup>.

### **References**

1. Zhu Y, Zhang D, Zhou D, et al. Susceptibility loci for metabolic syndrome and metabolic components identified in Han Chinese: a multi-stage genome-wide association study. *J Cell Mol Med* 2017; 21(6): 1106-16.
2. Xu J, Zhang L, Wu Q, et al. Body roundness index is a superior indicator to associate with the cardio-metabolic risk: evidence from a cross-sectional study with 17,000 Eastern-China adults. *BMC Cardiovasc Disord* 2021; 21(1): 97.
3. Wu Q, Sun X, Chen Q, Zhang X, Zhu Y. Genetically predicted selenium is negatively associated with serum TC, LDL-C and positively associated with HbA1C levels. *J Trace Elem Med Biol* 2021; 67: 126785.

### **S Figure legends**

**Figure S1.** Flow chart of the study design. UPLC-Q/TOF-MS, ultra-performance liquid chromatography-quadrupole/time of flight mass spectrometer; MetS, metabolic syndrome; SNP, single nucleotide polymorphism; MR, mendelian randomisation; mGWAS, genome-wide association study for metabolites.

**Figure S2.** Study design for the one-sample Mendelian Randomisation. GRS, gene risk score; SE, standard error; CI, confidence interval.

**Figure S3.** Distributions of each metabolic component in subjects with MetS in three datasets. Discovery dataset: N=240; Internal replication dataset: N=1157; External replication dataset: N=402. MetS, metabolic syndrome; BP, blood pressure; TG, triglyceride; HDL-C, high density lipoprotein cholesterol; FPG, fasting plasma glucose.

**Figure S4.** Q-Q Plots for the five metabolite biomarkers of MetS in the discovery stage (N=1062). MetS, metabolic syndrome;

**Figure S5.** Manhattan Plots for the five metabolite biomarkers of MetS in the discovery stage (N=1062). MetS, metabolic syndrome; the red line indicates suggestive association ( $P < 5 \times 10^{-5}$ )

**Figure S6.** Normalized LysoPC(15:0) levels in subjects with different SNP genotypes (N=1062). The error bar denotes the means  $\pm$  standard error.

**Figure S7.** GWAS regional plots for the three SNPs associated with LysoPC(15:0) (N=1062).

**Table S1. Regents and chemicals in targeted metabolomics analyses**

|                    | Chemicals                    | Manufactures                         |
|--------------------|------------------------------|--------------------------------------|
| Internal standards | L-phenylalanine 13C9, N1515N | Cambridge Isotope Laboratories, Inc. |
| Internal standards | Isoleucine 13C9,15N          | Cambridge Isotope Laboratories, Inc. |
| Internal standards | L-glutamyl-leucine 13C6,15N  | Nanjing Peptide Biotech Co., Ltd     |
| Internal standards | Propionyl carnitine d5       | Shanghai Zhenzhun Biotech Co., Ltd   |
| Internal standards | Docosapentaenoicacid-d5      | Shanghai Zhenzhun Biotech Co., Ltd   |
| Internal standards | LysoPC(14:0) d27             | Avanti Polar Lipids                  |
| Internal standards | Tryptophan d3                | Toronto Research Chemicals           |
| Standards          | L-phenylalanine              | Cambridge Isotope Laboratories, Inc. |
| Standards          | Isoleucine                   | Cambridge Isotope Laboratories, Inc. |
| Standards          | Tryptophan                   | Toronto Research Chemicals           |
| Standards          | L-glutamyl-leucine           | Nanjing Peptide Biotech Co., Ltd     |
| Standards          | Propionyl carnitine          | Toronto Research Chemicals           |
| Standards          | 5,8,11-Eicosatrienoic acid   | Shanghai Zhenzhun Biotech Co., Ltd   |
| Standards          | Docosapentaenoic acid        | Shanghai Zhenzhun Biotech Co., Ltd   |
| Standards          | LysoPC(14:0)                 | Shanghai Zhenzhun Biotech Co., Ltd   |
| Standards          | LysoPC(15:0)                 | Shanghai Zhenzhun Biotech Co., Ltd   |
| Standards          | LysoPE(16:0)                 | Shanghai Zhenzhun Biotech Co., Ltd   |
| Standards          | LPA(16:0)                    | Shanghai Zhenzhun Biotech Co., Ltd   |
| Standards          | LysoPC(16:1)                 | Sigma Anrich                         |
| Standards          | Indole-3-acetic acid         | Sigma Anrich                         |
| Standards          | cis-p-Coumaric acid          | Sigma Anrich                         |
| Standards          | 2-Phenylacetamide            | Sigma Anrich                         |
| Reagents           | Methanol                     | Fisher Chemical                      |
| Reagents           | dichloromethane              | Fisher Chemical                      |
| Reagents           | acetonitrile                 | Sigma Anrich                         |
| Reagents           | formic acid                  | Honeywell                            |
| Reagents           | water                        | Fisher Chemical                      |

**Table S2. Optimized MS parameters in targeted metabolomic analyses**

| Compounds                  | Polarity | Precursor (m/z) | Product (m/z) | Collision Energy (V) | RF len voltage |
|----------------------------|----------|-----------------|---------------|----------------------|----------------|
| L-Isoleucine               | Positive | 132.05          | 86.125        | 20                   | 34             |
| 2-Phenylacetamide          | Positive | 136.1           | 91            | 20                   | 52             |
| L-phenylalanine            | Positive | 166.1           | 120.042       | 12.71                | 33             |
| Indole-3-acetic acid       | Positive | 176.1           | 130.071       | 12.54                | 38             |
| Tryptophan                 | Positive | 205.1           | 188.125       | 9.47                 | 34             |
| cis-p-Coumaric acid        | Negative | 163.1           | 119.1         | 20                   | 101            |
| L-glutamyl-leucine         | Positive | 261.15          | 132.054       | 11.53                | 49             |
| Propionyl carnitine        | Positive | 218.15          | 85.113        | 18.65                | 51             |
| LysoPC(14:0)               | Negative | 512.299         | 227.201       | 20                   | 74             |
| LysoPC(15:0)               | Positive | 482.475         | 184.125       | 23.74                | 94             |
| LysoPE(16:0)               | Negative | 452.325         | 255.292       | 23.45                | 94             |
| LysoPC(16:1)               | Negative | 538.314         | 253.217       | 28                   | 75             |
| LPA(16:0)                  | Negative | 409.2           | 153           | 15                   | 80             |
| 5,8,11-Eicosatrienoic acid | Negative | 305.248         | 261.148       | 16                   | 80             |
| Docosapentaenoic acid      | Negative | 329.2           | 329.2         | 5                    | 78             |

MS, mass spectrometry; RF, radio frequency.

**Table S3. The validation of the method in targeted metabolomic analyses**

| Compounds                  | RT (min) | Linear                     | R2     | LOQ (ng/ml) | Repeatability | RSD (inter-day) | RSD(intra-day) |       |       |       |       |       |       |       |       |        |        |        |        |        |        |        |
|----------------------------|----------|----------------------------|--------|-------------|---------------|-----------------|----------------|-------|-------|-------|-------|-------|-------|-------|-------|--------|--------|--------|--------|--------|--------|--------|
|                            |          |                            |        |             |               |                 | Day 1          | Day 2 | Day 3 | Day 4 | Day 5 | Day 6 | Day 7 | Day 8 | Day 9 | Day 10 | Day 11 | Day 12 | Day 13 | Day 14 | Day 15 | Day 16 |
| cis-p-Coumaric acid        | 6.9      | $y = 4.67E-03x + 2.13E-01$ | 0.9955 | 2.5         | 0.022         | 0.085           | 0.075          | 0.04  | 0.034 | 0.06  | 0.052 | 0.06  | 0.05  | 0.037 | 0.049 | 0.051  | 0.059  | 0.106  | 0.062  | 0.022  | 0.029  | 0.081  |
| 5,8,11-Eicosatrienoic acid | 0.75     | $y = 5.59E-07x + 9.17E-04$ | 0.9967 | 100         | 0.05          | 0.196           | 0.251          | 0.22  | 0.093 | 0.14  | 0.183 | 0.14  | 0.1   | 0.056 | 0.141 | 0.106  | 0.162  | 0.072  | 0.122  | 0.094  | 0.069  | 0.3    |
| L-phenylalanine            | 2.5      | $y = 1.10E-07x + 1.14E-03$ | 0.998  | 100         | 0.061         | 0.017           | 0.027          | 0.01  | 0.017 | 0.01  | 0.016 | 0.02  | 0.01  | 0.027 | 0.019 | 0.001  | 0.012  | 0.017  | 0.017  | 0.013  | 0.014  | 0.015  |
| Tryptophan                 | 2.7      | $y = 1.32E-04x - 6.52E-04$ | 0.9999 | 2.5         | 0.035         | 0.016           | 0.017          | 0.01  | 0.009 | 0.01  | 0.01  | 0.01  | 0.02  | 0.012 | 0.01  | 0.014  | 0.009  | 0.008  | 0.009  | 0.013  | 0.011  | 0.011  |
| L-Isoleucine               | 3        | $y = 6.81E-05x + 2.57E-03$ | 0.9982 | 5           | 0.115         | 0.234           | 0.043          | 0.03  | 0.043 | 0.04  | 0.034 | 0.05  | 0.04  | 0.036 | 0.254 | 0.282  | 0.196  | 0.047  | 0.029  | 0.184  | 0.017  | 0.281  |
| Indole-3-acetic acid       | 3.3      | $y = 5.08E-05x - 4.00E-03$ | 0.9983 | 2.5         | 0.039         | 0.265           | 0.237          | 0.13  | 0.072 | 0.04  | 0.057 | 0.08  | 0.14  | 0.136 | 0.106 | 0.157  | 0.125  | 0.157  | 0.11   | 0.138  | 0.179  | 0.212  |
| L-glutamyl-leucine         | 3.5      | $y = 7.71E-05x - 4.06E-03$ | 0.9995 | 2.5         | 0.009         | 0.073           | 0.015          | 0.02  | 0.013 | 0.01  | 0.016 | 0.01  | 0.01  | 0.024 | 0.026 | 0.04   | 0.074  | 0.023  | 0.024  | 0.035  | 0.058  | 0.156  |
| 2-Phenylacetamide          | 4        | $y = 1.71E-05x + 1.65E-03$ | 0.9983 | 2.5         | 0.079         | 0.236           | 0.243          | 0.08  | 0.037 | 0.03  | 0.061 | 0.07  | 0.01  | 0.22  | 0.092 | 0.047  | 0.039  | 0.057  | 0.051  | 0.067  | 0.09   | 0.227  |
| Docosapentaenoic acid      | 6.38     | $y = 1.60E-03x + 2.50$     | 0.9981 | 250         | 0.084         | 0.152           | 0.126          | 0.19  | 0.156 | 0.16  | 0.16  | 0.22  | 0.22  | 0.126 | 0.126 | 0.193  | 0.075  | 0.104  | 0.11   | 0.158  | 0.079  | 0.077  |
| LysoPC (14:0)              | 1.9      | $y = 9.18E-05x - 5.20E-03$ | 0.9974 | 5           | 0.105         | 0.219           | 0.011          | 0.01  | 0.007 | 0.02  | 0.007 | 0.01  | 0.01  | 0.058 | 0.22  | 0.048  | 0.048  | 0.046  | 0.053  | 0.053  | 0.054  | 0.065  |
| LysoPC (15:0)              | 2.43     | $y = 7.85E-05x - 4.06E-03$ | 0.9981 | 2.5         | 0.116         | 0.058           | 0.01           | 0.02  | 0.023 | 0.06  | 0.011 | 0.02  | 0.06  | 0.032 | 0.092 | 0.028  | 0.014  | 0.082  | 0.019  | 0.014  | 0.086  | 0.052  |
| LysoPC (16:1)              | 1.85     | $y = 4.17E-05x + 1.41E-02$ | 0.9901 | 10          | 0.091         | 0.284           | 0.068          | 0.05  | 0.092 | 0.09  | 0.108 | 0.14  | 0.05  | 0.114 | 0.135 | 0.029  | 0.065  | 0.057  | 0.04   | 0.046  | 0.08   | 0.078  |

|                     |          |                            |            |     |       |       |           |      |           |      |           |      |      |           |           |           |           |           |           |           |           |           |
|---------------------|----------|----------------------------|------------|-----|-------|-------|-----------|------|-----------|------|-----------|------|------|-----------|-----------|-----------|-----------|-----------|-----------|-----------|-----------|-----------|
| LysoPE (16:0)       | 3.3<br>6 | $y = 4.56E-09x - 7.98E-07$ | 0.999<br>8 | 250 | 0.121 | 0.226 | 0.02<br>8 | 0.03 | 0.04<br>1 | 0.25 | 0.06<br>1 | 0.03 | 0.27 | 0.11<br>8 | 0.24<br>6 | 0.11<br>9 | 0.06<br>9 | 0.22<br>6 | 0.04<br>2 | 0.07<br>2 | 0.27<br>3 | 0.27<br>8 |
| Propionyl carnitine | 0.7<br>5 | $y = 6.42E-05x - 6.21E-04$ | 0.999<br>7 | 2.5 | 0.028 | 0.032 | 0.02<br>8 | 0.02 | 0.01      | 0.02 | 0.01<br>3 | 0.02 | 0.01 | 0.01<br>4 | 0.01<br>8 | 0.02<br>7 | 0.01<br>1 | 0.02<br>1 | 0.03      | 0.08<br>2 | 0.03<br>4 | 0.03      |
| LPA (16:0)          | 3.1      | $y = 1.97E-07x + 8.16E-06$ | 0.999<br>5 | 50  | 0.087 | 0.171 | 0.11<br>6 | 0.07 | 0.08<br>9 | 0.24 | 0.07<br>3 | 0.04 | 0.22 | 0.14<br>7 | 0.07<br>4 | 0.11<br>5 | 0.06<br>9 | 0.15<br>9 | 0.14<br>3 | 0.03<br>3 | 0.21<br>5 | 0.18<br>3 |

RT, retention time; LOQ, limit of quantification; RSD, relative standard deviation.



**Table S4. 36 metabolites that associated with MetS in the discovery stage (N=240)**

| Compounds                   | RT<br>(min) | Mass-to charge ratio | HMDB      | FC    | VIP   | P        | Ion mode | Category             |
|-----------------------------|-------------|----------------------|-----------|-------|-------|----------|----------|----------------------|
| 2-Phenylacetamide*          | 0.879       | 136.0752             | HMDB10715 | 0.827 | 2.47  | 5.34E-13 | +        | Organic compounds    |
| 5,8,11-Eicosatrienoic acid* | 10.382      | 305.249              | HMDB10378 | 0.667 | 2.886 | 2.18E-16 | -        | Fatty acids          |
| Linolenic acid*             | 8.874       | 279.2313             | HMDB03073 | 0.632 | 1.559 | 7.80E-13 | +        | Fatty acids          |
| cis-p-Coumaric acid*        | 0.877       | 165.0547             | HMDB30677 | 0.799 | 2.481 | 7.08E-14 | +        | Organic compounds    |
| Docosapentaenoic acid*      | 10.359      | 329.2485             | HMDB06528 | 0.647 | 2.159 | 4.37E-14 | -        | Fatty acids          |
| Indole-3-acetic acid        | 4.9         | 174.0557             | HMDB38628 | 0.662 | 1.718 | 1.87E-11 | -        | Organic compounds    |
| L-glutamyl-leucine*         | 2.712       | 261.1439             | HMDB11171 | 0.727 | 1.375 | 8.22E-08 | +        | Organic compounds    |
| L-Isoleucine*               | 1.029       | 132.1019             | HMDB00172 | 0.846 | 2.374 | 5.34E-13 | +        | Amino acids          |
| LPA (16:0)                  | 10.179      | 409.2356             | HMDB07849 | 0.776 | 2.323 | 9.86E-11 | -        | Glycerophospholipids |
| L-Phenylalanine*            | 1.397       | 166.0863             | HMDB00159 | 0.863 | 2.182 | 8.08E-10 | +        | Amino acids          |
| L-Tryptophan*               | 2.206       | 205.0969             | HMDB00929 | 0.839 | 1.922 | 3.32E-07 | +        | Amino acids          |
| L-Valine*                   | 0.669       | 118.0866             | HMDB00883 | 1.113 | 1.178 | 0.0263   | +        | Amino acids          |
| LysoPC(14:0) *              | 7.361       | 468.3082             | HMDB10379 | 0.609 | 2.456 | 1.26E-11 | +        | Glycerophospholipids |
| LysoPC(15:0) *              | 8.445       | 482.3237             | HMDB10381 | 0.69  | 2.637 | 2.62E-12 | +        | Glycerophospholipids |
| LysoPC(16:1)                | 7.576       | 494.3239             | HMDB10383 | 0.844 | 1.049 | 0.0015   | +        | Glycerophospholipids |
| LysoPC(18:3)                | 7.926       | 518.3224             | HMDB10387 | 0.913 | 1.293 | 0.00021  | +        | Glycerophospholipids |
| LysoPE(16:0) *              | 7.898       | 454.2922             | HMDB11473 | 0.708 | 2.294 | 1.32E-09 | +        | Glycerophospholipids |
| LysoPE(22:6)                | 7.79        | 526.2927             | HMDB11496 | 0.768 | 2.02  | 3.28E-08 | +        | Glycerophospholipids |
| PE (18:2/P-18:0)            | 11.3        | 728.5645             | HMDB09115 | 1.83  | 2.637 | 2.32E-15 | +        | Glycerophospholipids |
| 15(S)-HETE*                 | 9.602       | 319.2282             | HMDB03876 | 0.815 | 1.499 | 0.0004   | -        | Fatty Acyls          |
| 3-Hydroxybutyric acid*      | 0.692       | 103.0388             | HMDB00008 | 0.785 | 1.198 | 0.00029  | -        | Organic compounds    |
| 3-hydroxyhexadecanoic acid  | 9.246       | 271.2276             | HMDB61658 | 0.819 | 1.053 | 3.95E-05 | -        | Fatty acids          |
| 5-HEPE                      | 9.321       | 317.2119             | HMDB05081 | 0.715 | 1.355 | 1.70E-08 | -        | Fatty Acyls          |
| Alpha-dimorphelic acid      | 9.339       | 295.2278             | HMDB04670 | 0.679 | 1.588 | 1.94E-06 | -        | Fatty Acyls          |
| Betaine*                    | 0.735       | 116.0713             | HMDB00043 | 0.79  | 2.399 | 1.43E-13 | -        | Amino acids          |
| CPA (16:0)                  | 9.898       | 391.2265             | HMDB07003 | 0.787 | 1.275 | 6.48E-07 | -        | Glycerophospholipids |

|                      |        |          |           |       |       |          |   |                      |
|----------------------|--------|----------|-----------|-------|-------|----------|---|----------------------|
| L-Alanine            | 0.668  | 88.0403  | HMDB00161 | 0.848 | 1.828 | 8.08E-08 | - | Amino acids          |
| L-Histidine*         | 0.693  | 154.0615 | HMDB00177 | 0.876 | 1.631 | 7.87E-05 | - | Amino acids          |
| L-Leucine*           | 1.128  | 130.0872 | HMDB00687 | 0.769 | 2.43  | 5.34E-13 | - | Amino acids          |
| L-Proline*           | 0.693  | 114.0554 | HMDB00162 | 0.809 | 1.723 | 4.36E-06 | - | Amino acids          |
| L-Tyrosine*          | 0.852  | 180.0661 | HMDB00158 | 0.795 | 2.127 | 3.48E-10 | - | Amino acids          |
| LysoPC(20:3)         | 7.957  | 546.3541 | HMDB10393 | 0.815 | 1.514 | 3.26E-06 | + | Glycerophospholipids |
| LysoPE(20:0) *       | 10.698 | 508.3405 | HMDB11511 | 0.852 | 1.733 | 2.79E-06 | - | Glycerophospholipids |
| Trans-Cinnamic acid* | 1.844  | 147.0447 | HMDB00930 | 0.831 | 2.194 | 8.08E-10 | - | Organic compounds    |
| Propionyl carnitine  | 1.031  | 218.1382 | HMDB00824 | 0.766 | 1.746 | 1.85E-06 | + | Fatty Acyls          |
| Tsuzuic acid         | 9.606  | 225.1861 | HMDB05051 | 0.804 | 1.114 | 2.84E-05 | - | Fatty Acyls          |

RT, retention time; FC, fold change (control/MetS). FC<1 signifies that the metabolite is upregulated in MetS; VIP, variable importance in the projection, which is calculated by orthogonal partial least-squared discriminant analysis and reveals the contribution of each variable for the discrimination between the MetS patients and controls. P values are corrected by the false discovery rate. The primary metabolite identification is based on its RT and mass to charge ratio. \* means that metabolites were confirmed with available reference compounds.

**Table S5. Subgroup analyses by sex for associations between the 15 metabolites and MetS in the external validation (N=402)**

| Compounds                  | Men             |       | Women           |        |
|----------------------------|-----------------|-------|-----------------|--------|
|                            | OR (95%CI)      | P     | OR (95%CI)      | P      |
| Docosapentaenoic acid      | 1.65(1.15,2.36) | 0.007 | 1.72(1.19,2.47) | 0.004  |
| LysoPC (14:0)              | 1.72(1.18,2.51) | 0.005 | 1.92(1.37,2.69) | <0.001 |
| LysoPC (15:0)              | 1.28(0.90,1.82) | 0.164 | 1.53(1.14,2.07) | 0.005  |
| LysoPC (16:1)              | 1.02(0.76,1.38) | 0.885 | 1.17(0.86,1.58) | 0.316  |
| LysoPE (16:0)              | 1.13(0.82,1.55) | 0.451 | 1.31(0.93,1.83) | 0.122  |
| Propionyl carnitine        | 1.22(0.88,1.68) | 0.233 | 2.15(1.49,3.11) | <0.001 |
| LPA (16:0)                 | 1.14(0.72,1.80) | 0.585 | 0.89(0.70,1.13) | 0.33   |
| Cis-p-Coumaric-acid        | 0.89(0.66,1.21) | 0.459 | 1.12(0.81,1.56) | 0.496  |
| 5,8,11-Eicosatrienoic acid | 1.13(0.85,1.51) | 0.385 | 0.88(0.60,1.29) | 0.517  |
| L-phenylalanine            | 1.00(0.73,1.37) | 0.985 | 1.34(0.95,1.87) | 0.091  |
| Tryptophan                 | 0.94(0.68,1.30) | 0.721 | 1.57(1.13,2.18) | 0.007  |
| L-Isoleucine               | 1.48(1.06,2.06) | 0.023 | 1.08(0.78,1.48) | 0.65   |
| Indole-3-acetic-acid       | 0.81(0.58,1.12) | 0.201 | 1.43(1.03,1.99) | 0.034  |
| L-glutamyl-leucine         | 1.31(0.89,1.91) | 0.167 | 0.97(0.74,1.27) | 0.828  |
| 2-Phenylacetamide          | 1.28(0.91,1.79) | 0.157 | 1.29(0.92,1.81) | 0.14   |

The OR was adjusted for age and sex. OR, odds ratio; CI, confidence interval.

**Table S6. Sensitivity analyses for associations between the 15 metabolites and MetS**

| Compounds                  | Sensitivity Analysis <sup>a</sup> |        | Sensitivity Analysis <sup>b</sup> |        | Sensitivity Analysis <sup>c</sup> |        |
|----------------------------|-----------------------------------|--------|-----------------------------------|--------|-----------------------------------|--------|
|                            | OR (95%CI)                        | P      | OR (95%CI)                        | P      | OR (95%CI)                        | P      |
| Docosapentaenoic acid      | 1.59(1.24,2.05)                   | <0.001 | 1.53(1.17,2.00)                   | 0.002  | 1.78(1.21,2.62)                   | 0.004  |
| LysoPC (14:0)              | 1.93(1.50,2.49)                   | <0.001 | 2.02(1.52,2.68)                   | <0.001 | 2.38(1.59,3.56)                   | <0.001 |
| LysoPC (15:0)              | 1.45(1.15,1.82)                   | 0.002  | 1.49(1.13,1.97)                   | 0.005  | 1.57(1.11,2.23)                   | 0.011  |
| LysoPC (16:1)              | 1.02(0.83,1.26)                   | 0.849  | 1.10(0.85,1.42)                   | 0.484  | 0.95(0.69,1.32)                   | 0.769  |
| LysoPE (16:0)              | 1.24(0.98,1.55)                   | 0.071  | 1.16(0.89,1.53)                   | 0.273  | 1.01(0.68,1.49)                   | 0.973  |
| Propionyl carnitine        | 1.73(1.35,2.22)                   | <0.001 | 1.66(1.27,2.16)                   | <0.001 | 2.50(1.65,3.79)                   | <0.001 |
| LPA (16:0)                 | 0.97(0.79,1.19)                   | 0.757  | 0.86(0.59,1.26)                   | 0.441  | 0.76(0.47,1.21)                   | 0.248  |
| Cis-p-Coumaric-acid        | 1.00(0.80,1.25)                   | 0.992  | 1.04(0.80,1.35)                   | 0.765  | 1.01(0.72,1.42)                   | 0.962  |
| 5,8,11-Eicosatrienoic acid | 1.05(0.86,1.29)                   | 0.618  | 1.04(0.83,1.29)                   | 0.757  | 0.83(0.53,1.29)                   | 0.403  |
| L-phenylalanine            | 1.13(0.9,1.41)                    | 0.295  | 1.14(0.84,1.53)                   | 0.406  | 1.22(0.85,1.75)                   | 0.277  |
| Tryptophan                 | 1.20(0.96,1.50)                   | 0.115  | 1.37(1.04,1.80)                   | 0.025  | 1.63(1.15,2.32)                   | 0.006  |
| L-Isoleucine               | 1.24(0.99,1.54)                   | 0.057  | 1.25(0.96,1.61)                   | 0.092  | 1.17(0.85,1.61)                   | 0.342  |
| Indole-3-acetic-acid       | 1.06(0.85,1.33)                   | 0.614  | 1.11(0.85,1.45)                   | 0.45   | 1.46(1.05,2.04)                   | 0.026  |
| L-glutamyl-leucine         | 1.04(0.84,1.29)                   | 0.689  | 1.14(0.85,1.53)                   | 0.389  | 1.25(0.87,1.80)                   | 0.234  |
| 2-Phenylacetamide          | 1.33(1.05,1.68)                   | 0.02   | 1.54(1.17,2.02)                   | 0.002  | 1.63(1.15,2.31)                   | 0.006  |

The OR was adjusted for age and sex. a: excluding the subjects with cardiovascular diseases in the group of MetS (N=394); b: excluding the subjects with a history of drug use in the recent two weeks, including antihypertensives, anti-hyperglycaemia, anti-hyperlipidaemic, and anti-inflammatory drugs (N=333); c: excluding the subjects with smoking, drinking and the subjects with type 2 diabetes in the group of MetS (N=230). OR, odds ratio; CI, confidence interval.

**Table S7. Associations between quartiles of MRS and MetS and its components (N=402)**

| MRS             | MetS              | Overweight/Obesity | High BP          | Dyslipidaemia    | High FPG         |
|-----------------|-------------------|--------------------|------------------|------------------|------------------|
|                 | OR (95%CI)        | OR (95%CI)         | OR (95%CI)       | OR (95%CI)       | OR (95%CI)       |
| Q1: <-0.75      | Reference         | Reference          | Reference        | Reference        | Reference        |
| Q2: -0.75~-0.02 | 3.04(1.3,7.11)    | 3.25(1.28,8.22)    | 3.81(1.52,9.59)  | 3.01(1.11,8.18)  | 2.04(0.81,5.13)  |
| Q3: -0.02~0.73  | 7.44(3.26,16.99)  | 8.37(3.45,20.35)   | 7.08(2.88,17.4)  | 6.93(2.67,18.02) | 4.25(1.78,10.14) |
| Q4: 0.73~4.84   | 11.88(5.19,27.18) | 9.48(3.9,23.06)    | 10.2(4.18,24.89) | 13.98(5.44,35.9) | 7.74 (3.3,18.16) |

The OR was adjusted for age and sex. MRS, metabolite risk score, MetS, metabolic syndrome, BP, blood pressure, FPG, fasting plasma glucose; OR, odds ratio; CI, confidence interval.

**Table S8. Characteristics of subjects in the GWAS analyses**

|                          | Discovery stage (N=1062) | Replication stage (N=227) | P     |
|--------------------------|--------------------------|---------------------------|-------|
| MetS, N(%)               | 557 (52.4)               | 112 (49.3)                | 0.42  |
| Men, N(%)                | 530 (49.9)               | 139 (61.2)                | <0.01 |
| Age(Year)†               | 57.42 (0.32)             | 62.37 (0.84)              | <0.01 |
| BMI(kg/m <sup>2</sup> )† | 24.46 (0.11)             | 23.86 (0.21)              | 0.01  |
| SBP(mmHg)†               | 140.6 (0.71)             | 141.48 (1.68)             | 0.63  |
| DBP(mmHg)†               | 83.56 (0.40)             | 82.8 (0.90)               | 0.44  |
| TG(mmol/L)*              | 1.66 (1.31)              | 1.61 (1.15)               | 0.34  |
| Uric Acid(umol/L)*       | 5.75 (0.01)              | 5.76 (0.02)               | 0.47  |
| HDL-C(mmol/L)†           | 1.5 (0.01)               | 1.51 (0.02)               | 0.8   |
| Insulin(mmol/L)*         | 3.9 (3.4)                | 3.6 (3.2)                 | 0.12  |
| Glucose(mmol/L)*         | 5.14 (1.12)              | 5.16 (1.1)                | 0.25  |
| HOMA-IR*                 | 0.92 (0.96)              | 0.86 (0.98)               | 0.33  |

Data was presented as means (standard deviation) or median (interquartile range) or numbers (percentages). \* denotes that data was presented as median (interquartile range). † denotes that data was presented as mean (standard deviation). BMI, body mass index; SBP, systolic blood pressure; DBP, diastolic blood pressure; TG, triglycerides; HDL-C, high density lipoprotein cholesterol; MetS, metabolic syndrome; HOMA-IR, homeostasis model assessment of insulin resistance.

**Table S9. Genetic inflation factors for the five metabolite biomarkers of MetS (N=1062)**

| Compounds             | Lambda |
|-----------------------|--------|
| LysoPC (14:0)         | 1.005  |
| LysoPC (15:0)         | 1.006  |
| Docosapentaenoic acid | 0.997  |
| L-Phenylalanine       | 1.001  |
| Propionyl carnitine   | 1.004  |

**Table S10. Suggestive GWAS associations for the five metabolite biomarkers of MetS (N=1062)**

| Metabolites           | SNP        | C<br>H<br>R | POS       | Gene               | R<br>E<br>F | A<br>L<br>T | BETA  | SE    | P        |
|-----------------------|------------|-------------|-----------|--------------------|-------------|-------------|-------|-------|----------|
| LysoPC(15:0)          | rs1800588  | 15          | 58723675  | LIPC               | C           | T           | 0.30  | 0.045 | 3.63E-11 |
| LysoPC(15:0)          | rs11635491 | 15          | 58719741  | LIPC               | G           | A           | 0.27  | 0.044 | 2.92E-09 |
| LysoPC(15:0)          | rs7067822  | 10          | 110453691 | -                  | A           | G           | 0.21  | 0.045 | 5.46E-06 |
| LysoPC(15:0)          | rs724137   | 13          | 26284368  | ATP8A2             | T           | C           | 0.20  | 0.043 | 5.70E-06 |
| LysoPC(15:0)          | rs1815952  | 11          | 120655623 | GRIK4              | G           | A           | -0.22 | 0.049 | 6.88E-06 |
| LysoPC(15:0)          | rs73590561 | 19          | 36198178  | -                  | G           | A           | 0.33  | 0.075 | 9.01E-06 |
| LysoPC(15:0)          | rs2589654  | 5           | 10478798  | -                  | G           | T           | -0.27 | 0.062 | 1.03E-05 |
| LysoPC(15:0)          | rs7670211  | 4           | 185533332 | -                  | G           | A           | 0.22  | 0.050 | 1.17E-05 |
| LysoPC(15:0)          | rs1952458  | 6           | 51496168  | PKHD1              | T           | C           | -0.19 | 0.043 | 1.28E-05 |
| LysoPC(15:0)          | rs4708767  | 6           | 169024099 | SMOC2              | G           | A           | -0.22 | 0.051 | 1.36E-05 |
| LysoPC(15:0)          | rs11814873 | 10          | 8832403   | -                  | C           | T           | -0.38 | 0.087 | 1.39E-05 |
| LysoPC(15:0)          | rs7733748  | 5           | 9559366   | -                  | G           | C           | -0.41 | 0.095 | 2.02E-05 |
| LysoPC(15:0)          | rs4767016  | 12          | 113274679 | RPH3A              | A           | G           | -0.19 | 0.043 | 2.08E-05 |
| LysoPC(15:0)          | rs6923552  | 6           | 151862558 | CCDC170            | T           | C           | -0.20 | 0.048 | 2.34E-05 |
| LysoPC(15:0)          | rs852614   | 5           | 11006477  | CTNND2             | T           | C           | -0.21 | 0.050 | 2.77E-05 |
| LysoPC(15:0)          | rs4603925  | 3           | 154381756 | -                  | A           | G           | -0.20 | 0.047 | 3.21E-05 |
| LysoPC(15:0)          | rs17074437 | 5           | 171633449 | EFCAB9             | A           | G           | 0.19  | 0.046 | 3.37E-05 |
| LysoPC(15:0)          | rs6841347  | 4           | 55030785  | PDGFRA             | G           | T           | 0.29  | 0.070 | 3.97E-05 |
| LysoPC(15:0)          | rs9405361  | 6           | 7953426   | BLOC1S5-<br>TXNDC5 | C           | T           | 0.29  | 0.070 | 4.16E-05 |
| LysoPC(15:0)          | rs2261677  | 13          | 54679864  | -                  | C           | T           | 0.23  | 0.056 | 4.29E-05 |
| LysoPC(15:0)          | rs56337010 | 2           | 39751575  | LOC728730          | T           | C           | 0.27  | 0.065 | 4.36E-05 |
| LysoPC(15:0)          | rs2395699  | 6           | 38319951  | -                  | G           | A           | -0.24 | 0.058 | 4.64E-05 |
| LysoPC(15:0)          | rs2281164  | 1           | 14130628  | PRDM2              | A           | G           | -0.21 | 0.052 | 4.78E-05 |
| LysoPC(15:0)          | rs12128085 | 1           | 157785144 | FCRL1              | A           | G           | -0.25 | 0.061 | 4.85E-05 |
| LysoPC(15:0)          | rs626814   | 11          | 58448566  | -                  | C           | G           | -0.18 | 0.043 | 4.89E-05 |
| Docosapentaenoic acid | rs17167621 | 5           | 133900974 | PHF15              | G           | A           | 0.21  | 0.043 | 1.50E-06 |
| Docosapentaenoic acid | rs58170751 | 3           | 123960388 | KALRN              | G           | A           | -0.21 | 0.044 | 2.97E-06 |
| Docosapentaenoic acid | rs12457035 | 18          | 46157207  | CTIF               | T           | C           | 0.43  | 0.091 | 3.26E-06 |
| Docosapentaenoic acid | rs6450035  | 5           | 68656135  | TAF9               | A           | C           | -0.26 | 0.057 | 4.75E-06 |
| Docosapentaenoic acid | rs35836251 | 1           | 3829244   | LOC10013361<br>2   | G           | A           | -0.34 | 0.075 | 5.04E-06 |
| Docosapentaenoic acid | rs10077374 | 5           | 145285923 | -                  | G           | A           | 0.34  | 0.076 | 7.36E-06 |
| Docosapentaenoic acid | rs10914883 | 1           | 34681365  | C1orf94            | C           | G           | -0.27 | 0.061 | 8.29E-06 |
| Docosapentaenoic acid | rs961316   | 2           | 31520023  | -                  | A           | G           | 0.29  | 0.066 | 1.42E-05 |
| Docosapentaenoic acid | rs2411069  | 17          | 75022811  | -                  | A           | G           | 0.20  | 0.046 | 1.76E-05 |
| Docosapentaenoic acid | rs10848622 | 12          | 2274051   | CACNA1C            | G           | A           | 0.19  | 0.044 | 2.07E-05 |
| Docosapentaenoic acid | rs7774871  | 6           | 37565411  | -                  | T           | G           | 0.24  | 0.056 | 2.62E-05 |
| Docosapentaenoic acid | rs7331224  | 13          | 25568364  | -                  | A           | G           | 0.40  | 0.096 | 2.70E-05 |
| Docosapentaenoic acid | rs1831324  | 3           | 67644071  | SUCLG2             | T           | C           | 0.18  | 0.044 | 2.78E-05 |
| Docosapentaenoic acid | rs4716285  | 6           | 18558416  | AK098665           | G           | A           | -0.24 | 0.056 | 3.08E-05 |
| Docosapentaenoic acid | rs2159068  | 22          | 17653955  | -                  | C           | G           | -0.35 | 0.083 | 3.15E-05 |
| Docosapentaenoic acid | rs6045738  | 20          | 18974853  | -                  | G           | A           | -0.20 | 0.048 | 3.16E-05 |
| Docosapentaenoic acid | rs2684303  | 3           | 132003117 | CPNE4              | T           | C           | 0.19  | 0.045 | 3.18E-05 |
| Docosapentaenoic acid | rs3935652  | 1           | 202699678 | KDM5B              | T           | C           | -0.22 | 0.052 | 3.21E-05 |
| Docosapentaenoic acid | rs4821004  | 22          | 32366359  | -                  | C           | T           | -0.24 | 0.058 | 3.34E-05 |
| Docosapentaenoic acid | rs16842643 | 4           | 8606080   | CPZ                | A           | G           | -0.27 | 0.064 | 3.44E-05 |
| Docosapentaenoic acid | rs231170   | 8           | 116403541 | -                  | T           | C           | -0.34 | 0.082 | 3.48E-05 |



|                       |             |    |           |              |   |   |       |       |          |
|-----------------------|-------------|----|-----------|--------------|---|---|-------|-------|----------|
| Docosapentaenoic acid | rs644503    | 2  | 31489826  | EHD3         | G | C | 0.29  | 0.070 | 3.49E-05 |
| Docosapentaenoic acid | rs1524432   | 7  | 156176573 | -            | A | G | 0.20  | 0.048 | 3.59E-05 |
| Docosapentaenoic acid | rs56233657  | 14 | 29910912  | MIR548AI     | C | A | 0.22  | 0.054 | 3.62E-05 |
| Docosapentaenoic acid | rs9790042   | 3  | 149900177 | -            | A | T | 0.19  | 0.047 | 3.75E-05 |
| Docosapentaenoic acid | rs2875295   | 13 | 39843614  | -            | A | C | -0.26 | 0.063 | 3.78E-05 |
| Docosapentaenoic acid | rs8089159   | 18 | 49002076  | LOC100287225 | T | C | -0.37 | 0.091 | 4.18E-05 |
| Docosapentaenoic acid | rs225470    | 12 | 126394467 | -            | A | G | -0.21 | 0.050 | 4.23E-05 |
| Docosapentaenoic acid | rs11868624  | 17 | 7275379   | -            | C | T | 0.21  | 0.052 | 4.96E-05 |
| L-Phenylalanine       | rs6588028   | 1  | 63872871  | ALG6         | A | G | -0.22 | 0.046 | 3.05E-06 |
| L-Phenylalanine       | rs9898042   | 17 | 17238058  | NT5M         | G | T | -0.32 | 0.069 | 4.59E-06 |
| L-Phenylalanine       | rs10737482  | 1  | 20173858  | -            | T | C | -0.31 | 0.068 | 6.10E-06 |
| L-Phenylalanine       | rs6790068   | 3  | 189607626 | TP63         | A | G | -0.20 | 0.044 | 8.61E-06 |
| L-Phenylalanine       | rs10773323  | 12 | 127229327 | LINC00944    | T | A | -0.34 | 0.075 | 8.99E-06 |
| L-Phenylalanine       | rs4554846   | 10 | 125923609 | -            | C | G | 0.19  | 0.045 | 1.55E-05 |
| L-Phenylalanine       | rs2250361   | 4  | 179391633 | -            | A | G | -0.21 | 0.048 | 1.69E-05 |
| L-Phenylalanine       | rs6800260   | 3  | 21519145  | ZNF385D      | A | G | 0.18  | 0.042 | 2.28E-05 |
| L-Phenylalanine       | rs10737483  | 1  | 20174139  | -            | G | T | -0.19 | 0.044 | 2.32E-05 |
| L-Phenylalanine       | rs7124972   | 11 | 81002799  | -            | C | T | -0.28 | 0.067 | 2.48E-05 |
| L-Phenylalanine       | rs13180979  | 5  | 114826454 | -            | G | A | 0.19  | 0.044 | 2.53E-05 |
| L-Phenylalanine       | rs11224859  | 11 | 101434460 | TRPC6        | T | C | -0.46 | 0.110 | 2.66E-05 |
| L-Phenylalanine       | rs1809808   | 11 | 61444984  | DAGLA        | T | C | 0.24  | 0.057 | 2.87E-05 |
| L-Phenylalanine       | rs2972822   | 5  | 75559550  | SV2C         | G | C | 0.26  | 0.061 | 2.88E-05 |
| L-Phenylalanine       | rs61831491  | 10 | 4428895   | AK095699     | C | T | 0.25  | 0.059 | 3.13E-05 |
| L-Phenylalanine       | rs116494824 | 7  | 13437103  | -            | T | C | 0.37  | 0.088 | 3.39E-05 |
| L-Phenylalanine       | rs7030762   | 9  | 102166506 | -            | T | G | -0.21 | 0.050 | 3.46E-05 |
| L-Phenylalanine       | rs117135667 | 20 | 12429471  | -            | C | T | 0.27  | 0.064 | 3.46E-05 |
| L-Phenylalanine       | rs12420414  | 11 | 69679342  | -            | G | A | -0.21 | 0.050 | 3.82E-05 |
| L-Phenylalanine       | rs1216511   | 11 | 100354209 | -            | T | C | -0.20 | 0.048 | 4.10E-05 |
| L-Phenylalanine       | rs1502282   | 11 | 100503707 | -            | G | C | -0.18 | 0.044 | 4.51E-05 |
| L-Phenylalanine       | rs9559244   | 13 | 87128596  | -            | C | T | -0.19 | 0.046 | 4.66E-05 |
| L-Phenylalanine       | rs2634739   | 3  | 67609711  | SUCLG2       | C | T | 0.18  | 0.044 | 4.82E-05 |
| L-Phenylalanine       | rs2023238   | 6  | 84282761  | SNAP91       | A | G | -0.18 | 0.044 | 4.92E-05 |
| LysoPC(14:0)          | rs6827159   | 4  | 32912873  | -            | T | C | -0.24 | 0.048 | 9.27E-07 |
| LysoPC(14:0)          | rs9431106   | 1  | 218953878 | -            | G | A | 0.30  | 0.063 | 1.97E-06 |
| LysoPC(14:0)          | rs6535261   | 4  | 82519643  | -            | A | G | 0.22  | 0.046 | 2.03E-06 |
| LysoPC(14:0)          | rs7518437   | 1  | 187285254 | -            | T | C | -0.21 | 0.045 | 4.07E-06 |
| LysoPC(14:0)          | rs884392    | 11 | 122616553 | UBASH3B      | G | A | 0.32  | 0.070 | 6.54E-06 |
| LysoPC(14:0)          | rs2356927   | 1  | 232533667 | SIPA1L2      | T | C | 0.22  | 0.049 | 9.44E-06 |
| LysoPC(14:0)          | rs28571941  | 16 | 8509325   | -            | G | A | 0.24  | 0.054 | 9.50E-06 |
| LysoPC(14:0)          | rs11814873  | 10 | 8832403   | -            | C | T | -0.38 | 0.087 | 1.08E-05 |
| LysoPC(14:0)          | rs2170772   | 12 | 94948566  | -            | G | A | 0.23  | 0.054 | 1.60E-05 |
| LysoPC(14:0)          | rs1946539   | 2  | 43357022  | -            | A | C | -0.20 | 0.046 | 1.92E-05 |
| LysoPC(14:0)          | rs765722    | 11 | 95413118  | -            | T | A | -0.31 | 0.072 | 1.95E-05 |
| LysoPC(14:0)          | rs509023    | 15 | 55419915  | -            | A | G | 0.55  | 0.129 | 2.55E-05 |
| LysoPC(14:0)          | rs1174864   | 7  | 53127559  | -            | G | A | -0.24 | 0.056 | 2.62E-05 |
| LysoPC(14:0)          | rs55699809  | 17 | 69329434  | -            | C | A | 0.33  | 0.079 | 2.73E-05 |
| LysoPC(14:0)          | rs2084766   | 16 | 8506623   | -            | C | G | 0.19  | 0.046 | 3.19E-05 |
| LysoPC(14:0)          | rs140967063 | 3  | 18369026  | -            | A | G | 0.19  | 0.045 | 3.30E-05 |
| LysoPC(14:0)          | rs17039727  | 2  | 60532247  | -            | G | A | -0.20 | 0.048 | 3.52E-05 |

|                     |            |    |           |                    |   |   |       |       |          |
|---------------------|------------|----|-----------|--------------------|---|---|-------|-------|----------|
| LysoPC(14:0)        | rs6725161  | 2  | 57064177  | -                  | T | A | 0.22  | 0.052 | 3.65E-05 |
| LysoPC(14:0)        | rs3909878  | 16 | 14114137  | BC039386           | A | G | -0.20 | 0.048 | 4.62E-05 |
| LysoPC(14:0)        | rs4266432  | 5  | 35733096  | SPEF2              | A | T | 0.29  | 0.071 | 4.77E-05 |
| LysoPC(14:0)        | rs4651374  | 1  | 187363621 | -                  | G | A | -0.18 | 0.044 | 4.83E-05 |
| Propionyl carnitine | rs726913   | 15 | 61495779  | RORA               | G | A | 0.23  | 0.045 | 3.15E-07 |
| Propionyl carnitine | rs72500277 | 22 | 29490783  | KREMEN1            | T | C | -0.34 | 0.069 | 1.36E-06 |
| Propionyl carnitine | rs73233712 | 4  | 41521805  | LIMCH1             | C | T | 0.35  | 0.075 | 3.13E-06 |
| Propionyl carnitine | rs35310703 | 2  | 206029001 | PAR3B              | G | T | -0.40 | 0.088 | 8.15E-06 |
| Propionyl carnitine | rs7737383  | 5  | 155748355 | SGCD               | G | A | 0.28  | 0.063 | 8.33E-06 |
| Propionyl carnitine | rs4819564  | 22 | 17712611  | -                  | G | A | 0.25  | 0.057 | 1.05E-05 |
| Propionyl carnitine | rs2336661  | 3  | 52900424  | TMEM110-<br>MUSTN1 | C | G | 0.54  | 0.123 | 1.11E-05 |
| Propionyl carnitine | rs502645   | 3  | 145687497 | -                  | G | A | 0.19  | 0.044 | 1.28E-05 |
| Propionyl carnitine | rs10412849 | 19 | 3024624   | TLE2               | G | A | -0.20 | 0.046 | 1.51E-05 |
| Propionyl carnitine | rs75523200 | 9  | 71422488  | PIP5K1B            | T | C | -0.21 | 0.049 | 1.76E-05 |
| Propionyl carnitine | rs2116796  | 5  | 166269115 | -                  | C | A | -0.19 | 0.044 | 1.79E-05 |
| Propionyl carnitine | rs2722836  | 9  | 120818807 | -                  | G | T | -0.33 | 0.078 | 1.96E-05 |
| Propionyl carnitine | rs2301446  | 22 | 29542915  | KREMEN1            | G | A | -0.32 | 0.074 | 2.32E-05 |
| Propionyl carnitine | rs6019456  | 20 | 47467379  | -                  | A | C | 0.37  | 0.088 | 2.37E-05 |
| Propionyl carnitine | rs73681799 | 7  | 16285485  | ISPD               | A | C | 0.22  | 0.053 | 2.46E-05 |
| Propionyl carnitine | rs1559407  | 16 | 79229377  | WVOX               | T | C | -0.26 | 0.062 | 2.53E-05 |
| Propionyl carnitine | rs11086862 | 20 | 41754601  | PTPRT              | T | C | 0.20  | 0.048 | 2.61E-05 |
| Propionyl carnitine | rs2033977  | 11 | 25878875  | -                  | A | G | -0.26 | 0.061 | 2.90E-05 |
| Propionyl carnitine | rs955908   | 1  | 187287948 | -                  | C | T | -0.19 | 0.045 | 3.07E-05 |
| Propionyl carnitine | rs76716735 | 1  | 14286149  | -                  | A | G | -0.31 | 0.073 | 3.12E-05 |
| Propionyl carnitine | rs17478850 | 10 | 8523830   | -                  | G | T | -0.21 | 0.049 | 3.12E-05 |
| Propionyl carnitine | rs4235722  | 5  | 155749584 | SGCD               | C | G | 0.22  | 0.053 | 3.52E-05 |
| Propionyl carnitine | rs3109036  | 4  | 165047368 | MARCH1             | G | A | -0.34 | 0.081 | 3.58E-05 |
| Propionyl carnitine | rs9514131  | 13 | 104090848 | -                  | G | T | -0.29 | 0.071 | 3.74E-05 |
| Propionyl carnitine | rs441869   | 2  | 39178493  | ARHGEF33           | G | C | 0.26  | 0.063 | 4.03E-05 |
| Propionyl carnitine | rs4745466  | 9  | 71604123  | PIP5K1B            | A | C | -0.19 | 0.045 | 4.13E-05 |
| Propionyl carnitine | rs4244897  | 15 | 92146615  | -                  | A | G | -0.32 | 0.077 | 4.21E-05 |
| Propionyl carnitine | rs3897731  | 13 | 35302209  | -                  | C | T | -0.20 | 0.050 | 4.49E-05 |
| Propionyl carnitine | rs12649326 | 4  | 137071676 | -                  | T | C | -0.20 | 0.049 | 4.52E-05 |
| Propionyl carnitine | rs7573966  | 2  | 37138046  | STRN               | C | A | 0.19  | 0.046 | 4.60E-05 |
| Propionyl carnitine | rs847100   | 20 | 45244632  | SLC13A3            | C | T | 0.20  | 0.050 | 4.66E-05 |
| Propionyl carnitine | rs12684083 | 9  | 79148591  | -                  | G | A | -0.19 | 0.046 | 4.69E-05 |
| Propionyl carnitine | rs694731   | 11 | 94338912  | PIWIL4             | G | A | 0.17  | 0.043 | 4.79E-05 |

SNP, single nucleotide polymorphism; CHR, chromosome; POS, position; REF. reference allele; ALT, alternative allele; MAF: minor allele frequency.

**Table S11. Associations of the suggestively associated SNPs with the five metabolite biomarkers of MetS in the replication stage (N=227)**

| Metabolites           | SNP               | CHR       | POS              | REF      | ALT      | BETA         | SE          | P            | Direction |
|-----------------------|-------------------|-----------|------------------|----------|----------|--------------|-------------|--------------|-----------|
| Docosapentaenoic acid | rs225470          | 12        | 126394467        | A        | G        | 0.30         | 0.10        | 0.005        | -         |
| <b>LysoPC(15:0)</b>   | <b>rs11635491</b> | <b>15</b> | <b>58719741</b>  | <b>G</b> | <b>A</b> | <b>0.24</b>  | <b>0.10</b> | <b>0.015</b> | <b>+</b>  |
| Docosapentaenoic acid | rs1831324         | 3         | 67644071         | T        | C        | -0.22        | 0.09        | 0.017        | -         |
| Propionyl carnitine   | rs35310703        | 2         | 206029001        | G        | T        | 0.46         | 0.21        | 0.030        | -         |
| <b>LysoPC(15:0)</b>   | <b>rs7067822</b>  | <b>10</b> | <b>110453691</b> | <b>A</b> | <b>G</b> | <b>0.22</b>  | <b>0.10</b> | <b>0.031</b> | <b>+</b>  |
| <b>LysoPC(15:0)</b>   | <b>rs1952458</b>  | <b>6</b>  | <b>51496168</b>  | <b>T</b> | <b>C</b> | <b>-0.19</b> | <b>0.09</b> | <b>0.044</b> | <b>+</b>  |
| L-Phenylalanine       | rs61831491        | 10        | 4428895          | C        | T        | -0.25        | 0.13        | 0.048        | -         |
| L-Phenylalanine       | rs13180979        | 5         | 114826454        | G        | A        | -0.17        | 0.09        | 0.056        | -         |
| L-Phenylalanine       | rs10737483        | 1         | 20174139         | G        | T        | -0.19        | 0.10        | 0.063        | +         |
| LysoPC(15:0)          | rs626814          | 11        | 58448566         | C        | G        | -0.17        | 0.09        | 0.065        | +         |
| Propionyl carnitine   | rs7573966         | 2         | 37138046         | C        | A        | 0.18         | 0.10        | 0.076        | +         |
| LysoPC(15:0)          | rs1800588         | 15        | 58723675         | C        | T        | 0.18         | 0.10        | 0.077        | +         |
| Docosapentaenoic acid | rs4821004         | 22        | 32366359         | C        | T        | -0.23        | 0.13        | 0.078        | +         |
| L-Phenylalanine       | rs2972822         | 5         | 75559550         | G        | C        | 0.21         | 0.13        | 0.105        | +         |
| LysoPC(15:0)          | rs9405361         | 6         | 7953426          | C        | T        | -0.24        | 0.15        | 0.113        | -         |
| Propionyl carnitine   | rs694731          | 11        | 94338912         | G        | A        | 0.15         | 0.09        | 0.120        | +         |
| Propionyl carnitine   | rs4244897         | 15        | 92146615         | A        | G        | 0.24         | 0.16        | 0.131        | -         |
| Docosapentaenoic acid | rs2159068         | 22        | 17653955         | C        | G        | 0.25         | 0.17        | 0.140        | -         |
| Docosapentaenoic acid | rs56233657        | 14        | 29910912         | C        | A        | 0.17         | 0.12        | 0.150        | +         |
| Propionyl carnitine   | rs76716735        | 1         | 14286149         | A        | G        | -0.23        | 0.16        | 0.152        | +         |
| L-Phenylalanine       | rs4554846         | 10        | 125923609        | C        | G        | 0.13         | 0.09        | 0.154        | +         |
| Propionyl carnitine   | rs10412849        | 19        | 3024624          | G        | A        | 0.14         | 0.10        | 0.166        | -         |
| L-Phenylalanine       | rs10737482        | 1         | 20173858         | T        | C        | -0.23        | 0.17        | 0.182        | +         |
| LysoPC(15:0)          | rs12128085        | 1         | 157785144        | A        | G        | 0.19         | 0.14        | 0.191        | -         |
| LysoPC(15:0)          | rs7733748         | 5         | 9559366          | G        | C        | -0.28        | 0.22        | 0.193        | +         |
| L-Phenylalanine       | rs6790068         | 3         | 189607626        | A        | G        | 0.13         | 0.10        | 0.199        | -         |
| LysoPC(15:0)          | rs4603925         | 3         | 154381756        | A        | G        | -0.13        | 0.10        | 0.200        | +         |
| Propionyl carnitine   | rs12684083        | 9         | 79148591         | G        | A        | -0.12        | 0.10        | 0.207        | +         |
| LysoPC(15:0)          | rs4767016         | 12        | 113274679        | A        | G        | 0.12         | 0.10        | 0.222        | -         |
| Docosapentaenoic acid | rs1524432         | 7         | 156176573        | A        | G        | -0.13        | 0.11        | 0.233        | -         |
| L-Phenylalanine       | rs116494824       | 7         | 13437103         | T        | C        | 0.24         | 0.20        | 0.241        | +         |
| LysoPC(15:0)          | rs1815952         | 11        | 120655623        | G        | A        | -0.12        | 0.11        | 0.243        | +         |
| LysoPC(14:0)          | rs884392          | 11        | 122616553        | G        | A        | 0.17         | 0.15        | 0.252        | +         |
| Propionyl carnitine   | rs2116796         | 5         | 166269115        | C        | A        | 0.11         | 0.10        | 0.252        | -         |
| L-Phenylalanine       | rs1809808         | 11        | 61444984         | T        | C        | -0.14        | 0.12        | 0.259        | -         |
| Propionyl carnitine   | rs955908          | 1         | 187287948        | C        | T        | 0.11         | 0.10        | 0.262        | -         |
| L-Phenylalanine       | rs11224859        | 11        | 101434460        | T        | C        | 0.29         | 0.26        | 0.266        | -         |
| LysoPC(14:0)          | rs6725161         | 2         | 57064177         | T        | A        | -0.13        | 0.12        | 0.268        | -         |
| Propionyl carnitine   | rs4819564         | 22        | 17712611         | G        | A        | 0.12         | 0.12        | 0.292        | +         |
| Propionyl carnitine   | rs2033977         | 11        | 25878875         | A        | G        | -0.13        | 0.12        | 0.296        | +         |
| Docosapentaenoic acid | rs2875295         | 13        | 39843614         | A        | C        | -0.15        | 0.14        | 0.298        | +         |
| Docosapentaenoic acid | rs4716285         | 6         | 18558416         | G        | A        | -0.14        | 0.14        | 0.305        | +         |
| LysoPC(14:0)          | rs140967063       | 3         | 18369026         | A        | G        | 0.10         | 0.10        | 0.309        | +         |
| Docosapentaenoic acid | rs2411069         | 17        | 75022811         | A        | G        | -0.11        | 0.11        | 0.310        | -         |
| Propionyl carnitine   | rs502645          | 3         | 145687497        | G        | A        | -0.10        | 0.10        | 0.314        | -         |
| LysoPC(15:0)          | rs73590561        | 19        | 36198178         | G        | A        | 0.19         | 0.19        | 0.321        | +         |
| Docosapentaenoic acid | rs10077374        | 5         | 145285923        | G        | A        | 0.17         | 0.17        | 0.326        | +         |

|                       |            |    |           |   |   |       |      |       |   |
|-----------------------|------------|----|-----------|---|---|-------|------|-------|---|
| LysoPC(14:0)          | rs2170772  | 12 | 94948566  | G | A | 0.12  | 0.12 | 0.333 | + |
| Docosapentaenoic acid | rs9790042  | 3  | 149900177 | A | T | -0.11 | 0.11 | 0.336 | - |
| LysoPC(15:0)          | rs4708767  | 6  | 169024099 | G | A | 0.11  | 0.11 | 0.338 | - |
| LysoPC(15:0)          | rs852614   | 5  | 11006477  | T | C | -0.10 | 0.11 | 0.340 | + |
| LysoPC(15:0)          | rs56337010 | 2  | 39751575  | T | C | 0.13  | 0.14 | 0.342 | + |
| Docosapentaenoic acid | rs7331224  | 13 | 25568364  | A | G | -0.22 | 0.23 | 0.343 | - |
| LysoPC(14:0)          | rs55699809 | 17 | 69329434  | C | A | 0.19  | 0.20 | 0.344 | + |
| LysoPC(15:0)          | rs6841347  | 4  | 55030785  | G | T | 0.15  | 0.16 | 0.347 | + |
| Docosapentaenoic acid | rs6045738  | 20 | 18974853  | G | A | 0.09  | 0.10 | 0.364 | - |
| Docosapentaenoic acid | rs6450035  | 5  | 68656135  | A | C | -0.11 | 0.12 | 0.367 | + |
| Propionyl carnitine   | rs11086862 | 20 | 41754601  | T | C | 0.09  | 0.10 | 0.381 | + |
| Propionyl carnitine   | rs3109036  | 4  | 165047368 | G | A | -0.15 | 0.18 | 0.400 | + |
| Docosapentaenoic acid | rs644503   | 2  | 31489826  | G | C | 0.13  | 0.15 | 0.408 | + |
| L-Phenylalanine       | rs6800260  | 3  | 21519145  | A | G | -0.07 | 0.09 | 0.413 | - |
| Docosapentaenoic acid | rs3935652  | 1  | 202699678 | T | C | 0.09  | 0.11 | 0.428 | - |
| LysoPC(14:0)          | rs11814873 | 10 | 8832403   | C | T | 0.13  | 0.17 | 0.435 | - |
| Propionyl carnitine   | rs72500277 | 22 | 29490783  | T | C | 0.14  | 0.18 | 0.436 | - |
| Propionyl carnitine   | rs726913   | 15 | 61495779  | G | A | 0.07  | 0.10 | 0.446 | + |
| L-Phenylalanine       | rs10773323 | 12 | 127229327 | T | A | 0.12  | 0.16 | 0.448 | - |
| Propionyl carnitine   | rs73681799 | 7  | 16285485  | A | C | 0.09  | 0.12 | 0.451 | + |
| LysoPC(14:0)          | rs765722   | 11 | 95413118  | T | A | -0.10 | 0.14 | 0.477 | + |
| Propionyl carnitine   | rs441869   | 2  | 39178493  | G | C | -0.08 | 0.12 | 0.486 | - |
| LysoPC(14:0)          | rs28571941 | 16 | 8509325   | G | A | 0.09  | 0.13 | 0.501 | + |
| L-Phenylalanine       | rs9898042  | 17 | 17238058  | G | T | 0.09  | 0.14 | 0.543 | - |
| Docosapentaenoic acid | rs961316   | 2  | 31520023  | A | G | -0.09 | 0.15 | 0.557 | - |
| Docosapentaenoic acid | rs2684303  | 3  | 132003117 | T | C | -0.06 | 0.10 | 0.562 | - |
| L-Phenylalanine       | rs12420414 | 11 | 69679342  | G | A | 0.06  | 0.10 | 0.565 | - |
| Docosapentaenoic acid | rs35836251 | 1  | 3829244   | G | A | -0.10 | 0.17 | 0.569 | + |
| L-Phenylalanine       | rs2634739  | 3  | 67609711  | C | T | 0.05  | 0.10 | 0.573 | + |
| Propionyl carnitine   | rs2336661  | 3  | 52900424  | C | G | -0.14 | 0.25 | 0.574 | - |
| Docosapentaenoic acid | rs12457035 | 18 | 46157207  | T | C | -0.11 | 0.19 | 0.580 | - |
| LysoPC(15:0)          | rs724137   | 13 | 26284368  | T | C | 0.05  | 0.09 | 0.595 | + |
| Propionyl carnitine   | rs7737383  | 5  | 155748355 | G | A | -0.08 | 0.15 | 0.595 | - |
| Docosapentaenoic acid | rs17167621 | 5  | 133900974 | G | A | -0.05 | 0.09 | 0.600 | - |
| Propionyl carnitine   | rs6019456  | 20 | 47467379  | A | C | 0.10  | 0.19 | 0.600 | + |
| LysoPC(14:0)          | rs7518437  | 1  | 187285254 | T | C | -0.05 | 0.10 | 0.608 | + |
| Docosapentaenoic acid | rs10914883 | 1  | 34681365  | C | G | -0.07 | 0.14 | 0.610 | + |
| Docosapentaenoic acid | rs231170   | 8  | 116403541 | T | C | -0.08 | 0.16 | 0.610 | + |
| Propionyl carnitine   | rs4745466  | 9  | 71604123  | A | C | -0.05 | 0.10 | 0.629 | + |
| Propionyl carnitine   | rs847100   | 20 | 45244632  | C | T | -0.05 | 0.11 | 0.636 | - |
| L-Phenylalanine       | rs7124972  | 11 | 81002799  | C | T | -0.06 | 0.14 | 0.666 | + |
| LysoPC(15:0)          | rs2395699  | 6  | 38319951  | G | A | 0.05  | 0.12 | 0.683 | - |
| LysoPC(14:0)          | rs2356927  | 1  | 232533667 | T | C | -0.04 | 0.11 | 0.684 | - |
| Docosapentaenoic acid | rs7774871  | 6  | 37565411  | T | G | -0.05 | 0.12 | 0.702 | - |
| LysoPC(14:0)          | rs1174864  | 7  | 53127559  | G | A | 0.05  | 0.12 | 0.703 | - |
| Docosapentaenoic acid | rs8089159  | 18 | 49002076  | T | C | -0.08 | 0.22 | 0.718 | + |
| LysoPC(15:0)          | rs6923552  | 6  | 151862558 | T | C | 0.04  | 0.10 | 0.718 | - |
| Propionyl carnitine   | rs75523200 | 9  | 71422488  | T | C | -0.04 | 0.10 | 0.726 | + |
| LysoPC(14:0)          | rs17039727 | 2  | 60532247  | G | A | -0.03 | 0.10 | 0.741 | + |
| LysoPC(14:0)          | rs3909878  | 16 | 14114137  | A | G | -0.03 | 0.10 | 0.749 | + |

|                       |             |    |           |   |   |       |      |       |   |
|-----------------------|-------------|----|-----------|---|---|-------|------|-------|---|
| LysoPC(14:0)          | rs6827159   | 4  | 32912873  | T | C | -0.03 | 0.10 | 0.766 | + |
| Propionyl carnitine   | rs12649326  | 4  | 137071676 | T | C | -0.03 | 0.11 | 0.768 | + |
| Propionyl carnitine   | rs4235722   | 5  | 155749584 | C | G | -0.04 | 0.12 | 0.771 | - |
| L-Phenylalanine       | rs2023238   | 6  | 84282761  | A | G | 0.03  | 0.10 | 0.778 | - |
| LysoPC(15:0)          | rs7670211   | 4  | 185533332 | G | A | -0.03 | 0.11 | 0.778 | - |
| Propionyl carnitine   | rs2301446   | 22 | 29542915  | G | A | 0.06  | 0.20 | 0.786 | - |
| Propionyl carnitine   | rs17478850  | 10 | 8523830   | G | T | 0.03  | 0.11 | 0.789 | - |
| Propionyl carnitine   | rs73233712  | 4  | 41521805  | C | T | -0.04 | 0.16 | 0.791 | - |
| L-Phenylalanine       | rs7030762   | 9  | 102166506 | T | G | -0.03 | 0.11 | 0.814 | + |
| L-Phenylalanine       | rs1502282   | 11 | 100503707 | G | C | -0.02 | 0.09 | 0.822 | + |
| LysoPC(14:0)          | rs9431106   | 1  | 218953878 | G | A | -0.03 | 0.14 | 0.827 | - |
| Propionyl carnitine   | rs9514131   | 13 | 104090848 | G | T | -0.03 | 0.16 | 0.837 | + |
| Docosapentaenoic acid | rs16842643  | 4  | 8606080   | A | G | -0.03 | 0.15 | 0.858 | + |
| Docosapentaenoic acid | rs10848622  | 12 | 2274051   | G | A | -0.02 | 0.10 | 0.867 | - |
| LysoPC(15:0)          | rs2589654   | 5  | 10478798  | G | T | 0.02  | 0.14 | 0.874 | - |
| Docosapentaenoic acid | rs58170751  | 3  | 123960388 | G | A | -0.01 | 0.10 | 0.878 | + |
| LysoPC(15:0)          | rs2281164   | 1  | 14130628  | A | G | -0.02 | 0.11 | 0.893 | + |
| LysoPC(15:0)          | rs17074437  | 5  | 171633449 | A | G | -0.01 | 0.10 | 0.899 | - |
| Propionyl carnitine   | rs2722836   | 9  | 120818807 | G | T | 0.02  | 0.17 | 0.907 | - |
| L-Phenylalanine       | rs1216511   | 11 | 100354209 | T | C | -0.01 | 0.10 | 0.912 | + |
| L-Phenylalanine       | rs9559244   | 13 | 87128596  | C | T | -0.01 | 0.10 | 0.912 | + |
| Propionyl carnitine   | rs1559407   | 16 | 79229377  | T | C | -0.01 | 0.13 | 0.912 | + |
| LysoPC(14:0)          | rs6535261   | 4  | 82519643  | A | G | -0.01 | 0.10 | 0.916 | - |
| L-Phenylalanine       | rs117135667 | 20 | 12429471  | C | T | -0.01 | 0.13 | 0.918 | - |
| LysoPC(14:0)          | rs1946539   | 2  | 43357022  | A | C | 0.01  | 0.10 | 0.925 | - |
| LysoPC(14:0)          | rs4651374   | 1  | 187363621 | G | A | 0.01  | 0.10 | 0.928 | - |
| Docosapentaenoic acid | rs11868624  | 17 | 7275379   | C | T | 0.01  | 0.12 | 0.948 | + |
| LysoPC(15:0)          | rs2261677   | 13 | 54679864  | C | T | 0.01  | 0.12 | 0.950 | + |
| LysoPC(14:0)          | rs4266432   | 5  | 35733096  | A | T | 0.01  | 0.15 | 0.961 | + |
| L-Phenylalanine       | rs6588028   | 1  | 63872871  | A | G | 0.00  | 0.10 | 0.966 | + |
| Propionyl carnitine   | rs3897731   | 13 | 35302209  | C | T | 0.00  | 0.11 | 0.973 | + |
| L-Phenylalanine       | rs2250361   | 4  | 179391633 | A | G | 0.00  | 0.10 | 0.986 | + |
| LysoPC(14:0)          | rs2084766   | 16 | 8506623   | C | G | 0.00  | 0.10 | 0.997 | + |
| LysoPC(15:0)          | rs11814873  | 10 | 8832403   | C | T | 0.00  | 0.17 | 0.998 | - |

SNP, single nucleotide polymorphism; CHR, chromosome; POS, position; REF, reference allele; ALT, alternative allele; MAF, minor allele frequency. A direction of "+" denotes that the association effect direction is consistent between the discovery and validation stage. Rows marked in yellow show successfully replicated associations.

**Table S12. Associations of the three LysoPC(15:0)-associated SNPs with MetS and its components**

| Traits    | SNP        | CHR | POS       | REF | ALT | BETA   | SE    | P        |
|-----------|------------|-----|-----------|-----|-----|--------|-------|----------|
| BMI       | rs11635491 | 15  | 58719741  | G   | A   | 0.184  | 0.163 | 2.58E-01 |
| BMI       | rs1952458  | 6   | 51496168  | T   | C   | -0.548 | 0.156 | 4.52E-04 |
| BMI       | rs7067822  | 10  | 110453691 | A   | G   | 0.269  | 0.163 | 9.91E-02 |
| DBP       | rs11635491 | 15  | 58719741  | G   | A   | 0.616  | 0.570 | 2.80E-01 |
| DBP       | rs1952458  | 6   | 51496168  | T   | C   | -0.699 | 0.550 | 2.04E-01 |
| DBP       | rs7067822  | 10  | 110453691 | A   | G   | 0.662  | 0.572 | 2.47E-01 |
| SBP       | rs11635491 | 15  | 58719741  | G   | A   | 0.858  | 0.991 | 3.86E-01 |
| SBP       | rs1952458  | 6   | 51496168  | T   | C   | -1.417 | 0.954 | 1.38E-01 |
| SBP       | rs7067822  | 10  | 110453691 | A   | G   | 1.727  | 0.992 | 8.21E-02 |
| FPG       | rs11635491 | 15  | 58719741  | G   | A   | -0.001 | 0.009 | 9.26E-01 |
| FPG       | rs1952458  | 6   | 51496168  | T   | C   | -0.006 | 0.008 | 4.84E-01 |
| FPG       | rs7067822  | 10  | 110453691 | A   | G   | -0.005 | 0.009 | 6.00E-01 |
| HOMA-IR   | rs11635491 | 15  | 58719741  | G   | A   | 0.060  | 0.031 | 5.81E-02 |
| HOMA-IR   | rs1952458  | 6   | 51496168  | T   | C   | -0.057 | 0.030 | 6.15E-02 |
| HOMA-IR   | rs7067822  | 10  | 110453691 | A   | G   | 0.043  | 0.032 | 1.71E-01 |
| Insulin   | rs11635491 | 15  | 58719741  | G   | A   | 0.060  | 0.028 | 2.93E-02 |
| Insulin   | rs1952458  | 6   | 51496168  | T   | C   | -0.051 | 0.027 | 5.67E-02 |
| Insulin   | rs7067822  | 10  | 110453691 | A   | G   | 0.047  | 0.028 | 8.76E-02 |
| TG        | rs11635491 | 15  | 58719741  | G   | A   | 0.012  | 0.011 | 2.88E-01 |
| TG        | rs1952458  | 6   | 51496168  | T   | C   | -0.034 | 0.011 | 1.61E-03 |
| TG        | rs7067822  | 10  | 110453691 | A   | G   | 0.021  | 0.011 | 6.49E-02 |
| HDL-C     | rs11635491 | 15  | 58719741  | G   | A   | 0.023  | 0.017 | 1.80E-01 |
| HDL-C     | rs1952458  | 6   | 51496168  | T   | C   | 0.017  | 0.017 | 3.09E-01 |
| HDL-C     | rs7067822  | 10  | 110453691 | A   | G   | -0.023 | 0.017 | 1.80E-01 |
| Uric acid | rs11635491 | 15  | 58719741  | G   | A   | 3.742  | 3.539 | 2.91E-01 |
| Uric acid | rs1952458  | 6   | 51496168  | T   | C   | -8.614 | 3.412 | 1.17E-02 |
| Uric acid | rs7067822  | 10  | 110453691 | A   | G   | 4.635  | 3.535 | 1.90E-01 |
| MetS      | rs11635491 | 15  | 58719741  | G   | A   | 1.058  | 0.093 | 5.43E-01 |
| MetS      | rs1952458  | 6   | 51496168  | T   | C   | 0.830  | 0.090 | 3.81E-02 |
| MetS      | rs7067822  | 10  | 110453691 | A   | G   | 1.111  | 0.093 | 2.60E-01 |

SNP, single nucleotide polymorphism; CHR, chromosome; POS, position; REF, reference allele; ALT, alternative allele; SE, standard error; BMI, body mass index; SBP, systolic blood pressure; DBP, diastolic blood pressure; TG, triglyceride; HDL-C, high density lipoprotein cholesterol; MetS, metabolic syndrome; FPG, fasting plasma glucose; HOMA-IR, homeostasis model assessment of insulin resistance.

**Table S13. One-sample MR analyses between LysoPC(15:0) and MetS and metabolic abnormalities (as dichotomized variables) (N=1062).**

|                    | Observational association |          |       | Causal association |       |
|--------------------|---------------------------|----------|-------|--------------------|-------|
|                    | OR (95%CI)                | P        | Power | OR (95%CI)         | P     |
| MetS               | 2.71 (2.31,3.19)          | 1.68E-33 | 0.79  | 1.60 (0.96,2.66)   | 0.070 |
| Overweight/Obesity | 1.96 (1.71,2.26)          | 6.30E-21 | 0.44  | 1.84 (1.10,3.08)   | 0.020 |
| High BP            | 2.41 (2.07,2.82)          | 3.56E-29 | 0.71  | 1.44 (0.87,2.38)   | 0.155 |
| Dyslipidaemia      | 2.83 (2.40,3.33)          | 1.67E-35 | 0.85  | 1.78 (1.07,2.98)   | 0.028 |
| High UA            | 1.53 (1.31,1.78)          | 6.02E-08 | 0.21  | 2.59 (1.36,4.93)   | 0.004 |
| High Insulin       | 1.93 (1.65,2.25)          | 2.77E-16 | 0.45  | 2.31 (1.27,4.18)   | 0.006 |
| High FBP           | 1.65 (1.41,1.94)          | 4.27E-10 | 0.26  | 1.15 (0.63,2.09)   | 0.647 |
| High HOMA-IR       | 2.08 (1.77,2.45)          | 4.20E-19 | 0.58  | 2.28 (1.26,4.13)   | 0.007 |

Data was presented as OR (95%CI). The OR was adjusted for age and sex. MetS, metabolic syndrome; BP, blood pressure; UA, uric acid; FPG, fasting plasma glucose; HOMA-IR, homeostasis model assessment of insulin resistance; MR, mendelian randomization; OR, odds ratio; CI, confidence interval. The cutoff value for high UA, high HOMA-IR, and high insulin is based on their respective 75th percentile.

**Table S14. One-sample MR analysis between LysoPC(15:0) and MetS components (as continuous variables) (N=1062).**

|         | Observational association |          |       | Causal association |       |
|---------|---------------------------|----------|-------|--------------------|-------|
|         | $\beta$ (95%CI)           | P        | Power | $\beta$ (95%CI)    | P     |
| BMI     | 1.09(0.88,1.30)           | 6.16E-24 | 0.61  | 1.42(0.48,2.35)    | 0.003 |
| SBP     | 6.69(5.43,7.95)           | 3.06E-24 | 0.29  | 5.72(0.19,11.25)   | 0.043 |
| DBP     | 3.75(3.02,4.48)           | 5.63E-23 | 0.37  | 2.84(-0.32,6.00)   | 0.078 |
| TG      | 0.76(0.67,0.85)           | 1.04E-55 | 1.00  | 0.54(0.11,0.97)    | 0.013 |
| HDL-C   | 0.01(-0.01,0.03)          | 3.65E-01 | 0.06  | -0.02(-0.11,0.08)  | 1.277 |
| UA      | 0.05(0.04,0.07)           | 1.08E-13 | 0.24  | 0.06(0.06,0.07)    | 0.045 |
| Insulin | 0.89(0.7,1.08)            | 1.50E-19 | 0.72  | 1.52(0.64,2.39)    | 0.001 |
| Glucose | 0.28(0.2,0.36)            | 4.23E-12 | 0.05  | 0.01(-0.32,0.34)   | 0.943 |
| HOMA-IR | 0.23(0.19,0.27)           | 3.82E-28 | 0.24  | 0.23(0.06,0.41)    | 0.010 |

Data was showed as  $\beta$ (95%CI). The OR was adjusted for age and sex. The values of uric acid (UA) and HOMA-IR were natural logarithm transformed. MR, mendelian randomization; MetS, metabolic syndrome; BMI, body mass index, SBP, systolic blood pressure; DBP, diastolic blood pressure; TG, triglycerides; HDL-C, high density lipoprotein cholesterol; FPG, fasting plasma glucose; HOMA-IR, homeostasis model assessment of insulin resistance; OR, odds ratio; CI, confidence interval.



**Table S15. The two-sample MR analysis between LysoPC(15:0) and metabolic markers..**

|              | $\beta$ (95%CI)      | P      | P for interception of the MR Egger | Power |
|--------------|----------------------|--------|------------------------------------|-------|
| <b>BMI</b>   |                      |        |                                    |       |
| IVW          | 0.011(-0.01,0.031)   | 0.306  | -                                  | 0.06  |
| WM           | 0.015(-0.019,0.05)   | 0.389  | -                                  | -     |
| MR-Egger     | 0.704(-0.136,1.544)  | 0.101  | 0.106                              | -     |
| <b>SBP</b>   |                      |        |                                    |       |
| IVW          | 0.012(-0.01,0.034)   | 0.276  | -                                  | 0.05  |
| WM           | 0.013(-0.016,0.042)  | 0.373  | -                                  | -     |
| MR-Egger     | 0.031(-0.521,0.583)  | 0.913  | 0.948                              | -     |
| <b>DBP</b>   |                      |        |                                    |       |
| IVW          | 0.009(-0.013,0.031)  | 0.433  | -                                  | 0.05  |
| WM           | 0.009(-0.019,0.037)  | 0.53   | -                                  | -     |
| MR-Egger     | 0.014(-0.446,0.475)  | 0.951  | 0.981                              | -     |
| <b>HDL-C</b> |                      |        |                                    |       |
| IVW          | 0.147(0.116,0.177)   | 0.001  | -                                  | 1.00  |
| WM           | 0.015(-0.034,0.064)  | 0.555  | -                                  | -     |
| MR-Egger     | -2.075(-9.256,5.106) | 0.571  | 0.54                               | -     |
| <b>TG</b>    |                      |        |                                    |       |
| IVW          | 0.07(0.05, 0.10)     | <0.001 | -                                  | 1.00  |
| WM           | 0.04(-0.01,0.09)     | 0.15   | -                                  | -     |
| MR-Egger     | -1.65(-4.64,1.34)    | 0.28   | 0.26                               | -     |

MR, mendelian randomization; TG, triglyceride; IVW, inverse variance weighted; WM, weighted Median; CI, confidence interval.

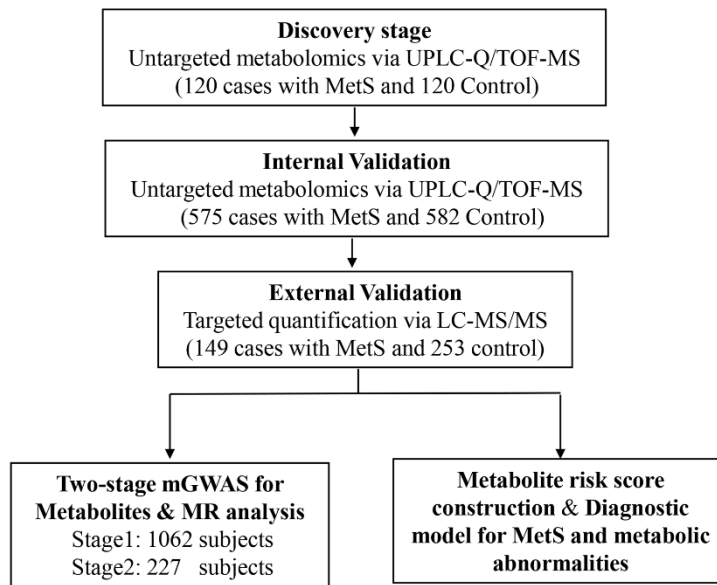

**Figure S1.** Flow chart of the study design

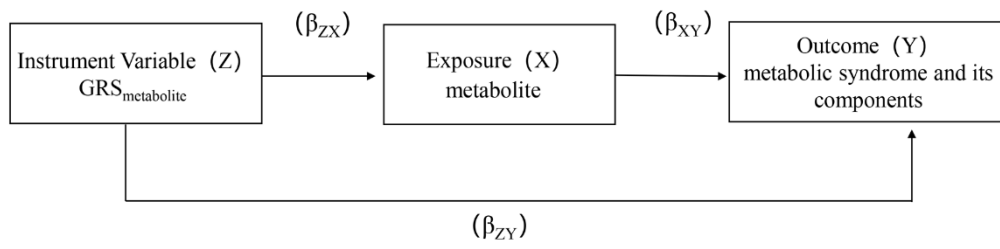

$$\beta_{IV} = \frac{\beta_{ZY}}{\beta_{ZX}}$$

$$95\%CI_{IV} = \beta_{IV} \pm 1.96 \times SE_{IV}$$

$$SE_{IV} = ABS(\beta_{IV}) \sqrt{(Se_{GRS\_exposure} / \beta_{GRS\_exposure})^2 + (Se_{GRS\_outcome} / \beta_{GRS\_outcome})^2}$$

**Figure S2.** Study design for the one-sample Mendelian Randomisation

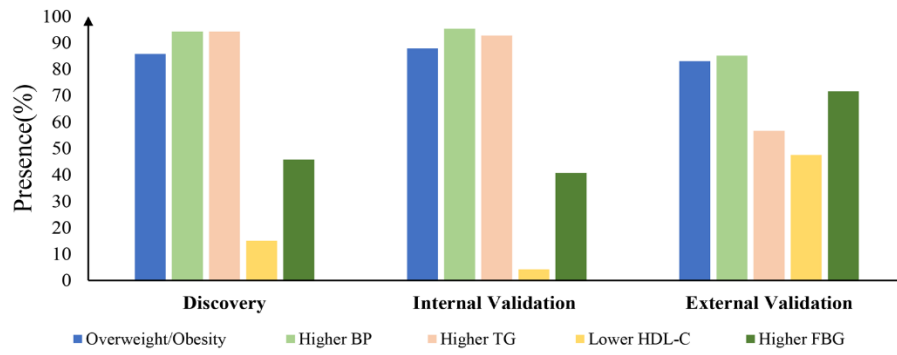

**Figure S3.** Distributions of each metabolic component in subjects with MetS in three datasets.

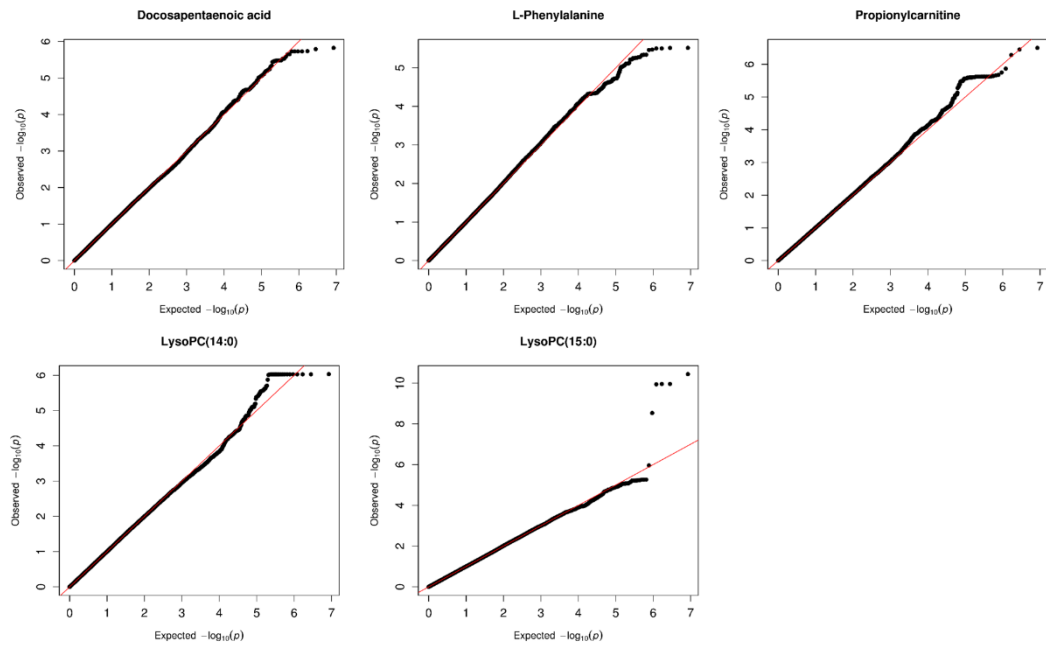

**Figure S4.** Q-Q Plots for the five metabolite biomarkers of MetS in the discovery stage (N=1062).

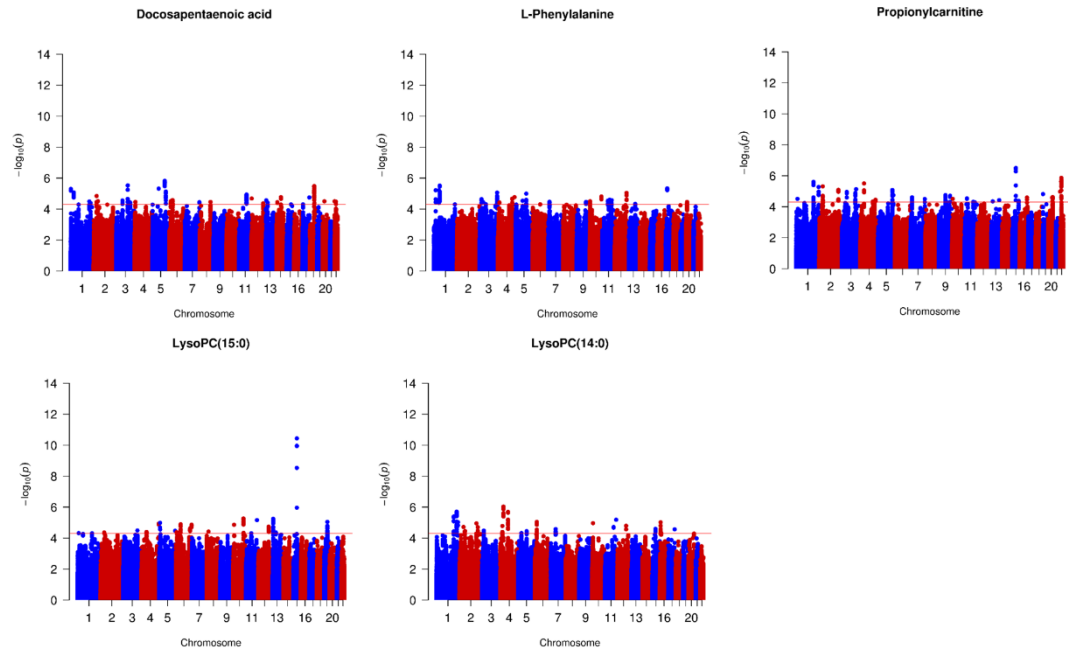

**Figure S5.** Manhattan Plots for the five metabolite biomarkers of MetS in the discovery stage (N=1062).

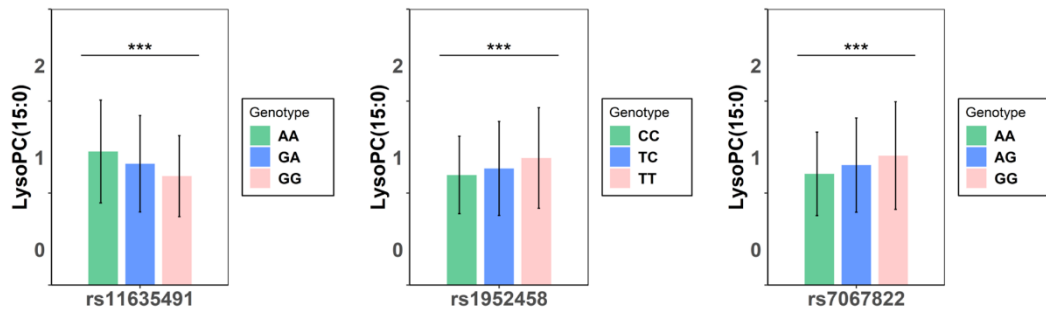

**Figure S6.** Normalized LysoPC(15:0) levels in subjects with different SNP genotypes (N=1062).

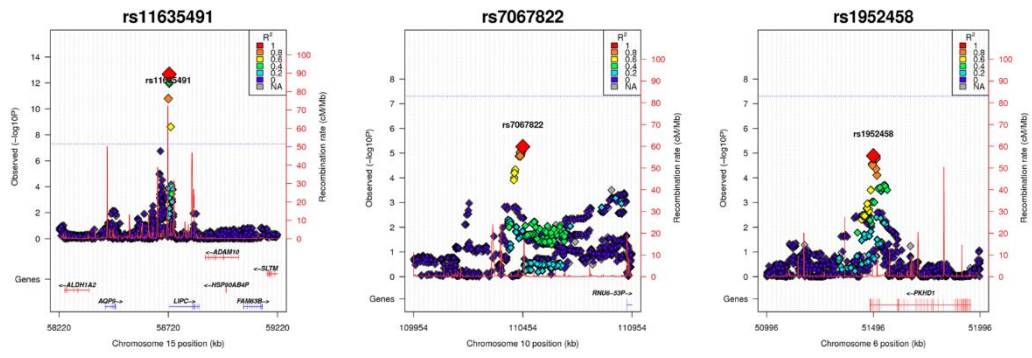

**Figure S7.** GWAS regional plots for the three SNPs associated with LysoPC(15:0) (N=1062).
